# Supplementary material for: Long-term mitochondrial and metabolic impairment in lymphocytes of subjects who recovered after severe COVID-19
Source: PubMed Central journal article supplement — Cell Biol Toxicol. 2025 Jan 10;41(1):27. doi: 10.1007/s10565-024-09976-0 (PMC11723900; doi:10.1007/s10565-024-09976-0), 2025-01-10
Supplement: 10565_2024_9976_MOESM1_ESM.pdf [file 10565_2024_9976_MOESM1_ESM.pdf]

## Supplementary Material

### Long-term mitochondrial and metabolic impairment in lymphocytes of subjects who recovered after severe COVID-19

Irene Gómez-Delgado<sup>1,2†</sup> \*, Andrea R. López-Pastor<sup>1,2†</sup>, Adela González-Jiménez<sup>1,2</sup>, Carlos Ramos-Acosta<sup>3</sup>, Yenitzeh Hernández-Garate<sup>1</sup>, Neus Martínez-Micaelo<sup>4</sup>, Nuria Amigó<sup>4,5,6</sup>, Laura Espino-Paisán<sup>1,2</sup>, Eduardo Anguita<sup>3,7,8†</sup>, Elena Urcelay<sup>1,2†\*</sup>

\* Correspondence:

Elena Urcelay

elenaurchelay@salud.madrid.org

**Supplementary Table 1. Primary antibodies used for flow cytometry analyses**

| Antibody | Clone | Fluorochrome | Supplier (ref.)    |
|----------|-------|--------------|--------------------|
| CD3      | UCHT1 | APC/Fire™    | BioLegend (300470) |
| CD3      | HIT3a | PE           | BioLegend (300308) |
| CD19     | HIB19 | APC          | BioLegend (302212) |
| CD19     | HIB19 | PB           | BioLegend (302232) |
| CD69     | FN50  | FITC         | BioLegend (310904) |

**Supplementary Table 2. Primary antibodies used for Western blot analyses**

| Antibody        | Host   | Concentration | Dilution | Supplier (ref.)          |
|-----------------|--------|---------------|----------|--------------------------|
| DRP1            | Mouse  | 0.25 µg/µL    | 1:500    | BD Biosciences (611112)  |
| FIS1            | Rabbit | 0.5 µg/µL     | 1:1000   | Proteintech (10956-1-AP) |
| MFN2            | Rabbit | 1.5 µg/µL     | 1:500    | Abcam (ab56889)          |
| OPA1            | Mouse  | 0.25 µg/µL    | 1:2000   | BD Biosciences (612606)  |
| OXPHOS          | Mouse  | 1.5 µg/µL     | 1:500    | Invitrogen (#45-8199)    |
| p-DRP1 (Ser616) | Rabbit | 1 µg/µL       | 1:500    | Cell Signaling (#3455)   |
| α-tubulin       | Rabbit | 1.1 µg/µL     | 1:5000   | Tetubio (600-401-880)    |

**Supplementary Table 3. Lipoprotein profile of serum samples from individuals who recovered of mild (CMC) and severe (CSC) COVID-19.**

|                             | CMC (n=12)       | CSC (n=12)       | p Value |
|-----------------------------|------------------|------------------|---------|
| <b>Cholesterol</b>          |                  |                  |         |
| Total Cholesterol (mg/dl)   | 219 [206;230]    | 205 [189;238]    | 0.419   |
| VLDL-Cholesterol (mg/dL)    | 11.8 [9.38;15.2] | 9.48 [6.50;12.7] | 0.149   |
| IDL-Cholesterol (mg/dL)     | 9.13 [8.32;11.0] | 8.48 [6.56;11.0] | 0.644   |
| LDL-Cholesterol (mg/dL)     | 134 [129;149]    | 130 [116;153]    | 0.729   |
| HDL-Cholesterol (mg/dL)     | 61.9 [57.1;66.2] | 58.0 [55.0;62.5] | 0.356   |
| <b>Triglycerides</b>        |                  |                  |         |
| Total Triglycerides (mg/dL) | 98.9 [85.3;123]  | 83.4 [73.6;98.0] | 0.119   |
| VLDL-Triglycerides (mg/dL)  | 57.7 [48.6;90.2] | 50.9 [41.2;65.4] | 0.149   |
| IDL-Triglycerides (mg/dL)   | 9.79 [8.61;11.5] | 9.09 [7.78;11.0] | 0.525   |
| LDL-Triglycerides (mg/dL)   | 14.0 [10.2;15.2] | 11.5 [10.9;16.0] | 0.954   |
| HDL-Triglycerides (mg/dL)   | 11.2 [8.07;12.1] | 9.56 [7.82;10.1] | 0.248   |
| <b>VLDL particles</b>       |                  |                  |         |
| VLDL-P (nM)                 | 40.2 [34.5;60.9] | 34.8 [29.6;45.2] | 0.204   |
| Large VLDL-P (nM)           | 1.02 [0.95;1.39] | 0.98 [0.81;1.26] | 0.225   |
| Medium VLDL-P (nM)          | 5.06 [4.17;7.02] | 4.06 [3.12;4.61] | 0.038   |
| Small VLDL-P (nM)           | 34.2 [29.6;51.1] | 29.7 [25.5;39.2] | 0.273   |
| VLDL-Diameter (nm)          | 42.3 [42.2;42.4] | 42.2 [42.1;42.3] | 0.065   |
| <b>LDL particles</b>        |                  |                  |         |
| LDL-P (nM)                  | 1289 [1216;1482] | 1285 [1182;1476] | 0.862   |
| Large LDL-P (nM)            | 214 [197;238]    | 201 [176;229]    | 0.686   |
| Medium LDL-P (nM)           | 425 [298;469]    | 366 [286;512]    | 0.817   |
| Small LDL-P (nM)            | 732 [643;783]    | 721 [663;742]    | 0.729   |
| LDL-Diameter (nm)           | 21.1 [20.9;21.2] | 21.1 [21.0;21.2] | 0.908   |
| <b>HDL particles</b>        |                  |                  |         |
| HDL-P (μmol/L)              | 29.2 [27.7;30.6] | 27.5 [26.7;28.5] | 0.133   |

|                                | CMC (n=12)       | CSC (n=12)       | p Value |
|--------------------------------|------------------|------------------|---------|
| Large HDL-P ( $\mu\text{M}$ )  | 0.29 [0.28;0.31] | 0.29 [0.27;0.33] | 0.954   |
| Medium HDL-P ( $\mu\text{M}$ ) | 10.2 [9.47;11.0] | 9.95 [8.75;10.8] | 0.386   |
| Small HDL-P( $\mu\text{M}$ )   | 18.1 [17.1;18.8] | 17.2 [16.0;18.8] | 0.386   |
| HDL-Diameter (nm)              | 8.28 [8.23;8.30] | 8.26 [8.25;8.30] | 0.954   |
| <b>Lipoprotein composition</b> |                  |                  |         |
| VLDL-TG/VLDL-C                 | 5.27 [4.70;6.17] | 5.91 [5.00;6.35] | 0.356   |
| IDL-TG/IDL-C                   | 1.08 [0.96;1.20] | 1.04 [1.00;1.24] | 0.773   |
| LDL-TG/LDL-C                   | 0.10 [0.09;0.11] | 0.10 [0.09;0.11] | 0.773   |
| HDL-TG/HDL-C                   | 0.16 [0.14;0.21] | 0.16 [0.14;0.17] | 0.603   |

VLDL: Very Low-Density Lipoprotein; IDL: Intermediate-Density Lipoprotein; LDL: Low-Density Lipoprotein; HDL: High-Density Lipoprotein; P: Particles (referring to lipoprotein particles). Statistical significance was evaluated by using the Kruskal-Wallis test.

**Supplementary Table 4. Glycoprotein profile of serum samples from individuals who recovered of mild (CMC) and severe (CSC) COVID-19.**

|                              | CMC (n=12)       | CSC (n=12)       | p Value |
|------------------------------|------------------|------------------|---------|
| <b>Glycoprotein profile</b>  |                  |                  |         |
| Glyc-B ( $\mu\text{mol/L}$ ) | 309 [296;345]    | 334 [305;354]    | 0.248   |
| Glyc-A ( $\mu\text{mol/L}$ ) | 641 [572;694]    | 657 [599;707]    | 0.729   |
| H/W Glyc-B                   | 3.89 [3.72;4.36] | 4.20 [3.83;4.45] | 0.386   |
| H/W Glyc-A                   | 15.6 [13.6;16.3] | 16.2 [14.3;17.2] | 0.356   |

Glyc: Glycoprotein. Statistical significance was evaluated by using the Kruskal-Wallis test.

**Supplementary Table 5. Lipid profile of serum samples from individuals who recovered of mild (CMC) and severe (CSC) COVID-19.**

|                              | CMC (n=12)       | CSC (n=12)       | p Value |
|------------------------------|------------------|------------------|---------|
| <b>Lipid profile</b>         |                  |                  |         |
| Esterified cholesterol (mM)  | 2.57 [2.34;3.05] | 2.60 [2.12;2.79] | 0.644   |
| Free cholesterol (mM)        | 2.45 [2.16;2.64] | 2.37 [2.19;2.46] | 0.326   |
| Triglycerides (mM)           | 1.03 [0.72;1.37] | 0.72 [0.56;0.91] | 0.149   |
| Glycerophospholipids (mM)    | 3.72 [3.36;3.91] | 3.43 [3.12;3.74] | 0.299   |
| Phosphatidylcholine (mM)     | 3.10 [2.83;3.26] | 2.90 [2.62;3.20] | 0.453   |
| Sphingomyelin (mM)           | 0.93 [0.90;0.99] | 0.93 [0.90;1.02] | 1.000   |
| Lysophosphatidylcholine (mM) | 0.86 [0.78;0.92] | 0.76 [0.70;0.84] | 0.083   |
| PUFA (mM)                    | 15.2 [13.0;16.6] | 15.1 [11.4;16.3] | 0.729   |
| Linoleic (mM)                | 4.32 [3.98;4.81] | 4.31 [3.99;4.61] | 0.773   |
| SFA (mM)                     | 10.0 [9.73;10.6] | 9.58 [9.14;11.3] | 0.644   |
| w6 & w7 fatty acids (mM)     | 6.10 [5.24;7.45] | 6.10 [5.62;6.47] | 0.954   |
| w9 fatty acids (mM)          | 3.10 [2.38;4.54] | 3.03 [1.88;3.41] | 0.453   |
| w3 fatty acids (mM)          | 0.27 [0.21;0.30] | 0.27 [0.25;0.32] | 0.386   |
| DHA (mM)                     | 0.15 [0.14;0.16] | 0.14 [0.11;0.18] | 0.326   |
| AA + EPA (mM)                | 1.83 [1.61;2.04] | 1.62 [1.35;1.88] | 0.386   |

PUFA: Polyunsaturated Fatty Acid; SFA: Saturated Fatty Acid; w3: Omega-3 Fatty Acid; w6: Omega-6 Fatty Acid; w7: Omega-7 Fatty Acid; w9: Omega-9 Fatty Acid; DHA: Docosahexaenoic Acid; AA: Arachidonic Acid; EPA: Eicosapentaenoic Acid. Statistical significance was evaluated by using the Kruskal-Wallis test.

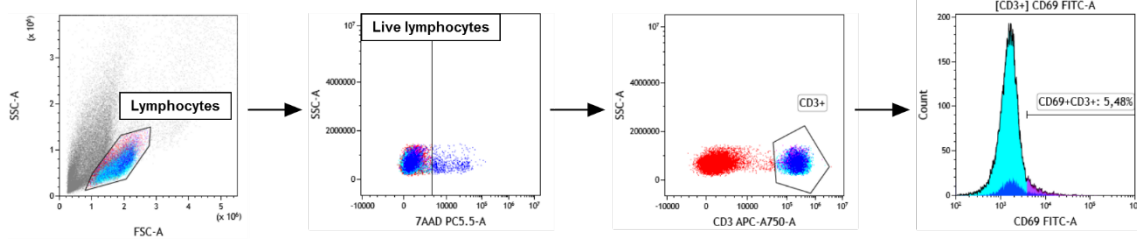

**Supplementary Figure S1. Gating strategy of the CD69 flow cytometry.** Gating strategy performed with CD3<sup>+</sup>CD19<sup>-</sup> lymphocytes from CMC and CSC individuals to analyse the immune cell activation through CD69 surface expression by flow cytometry.

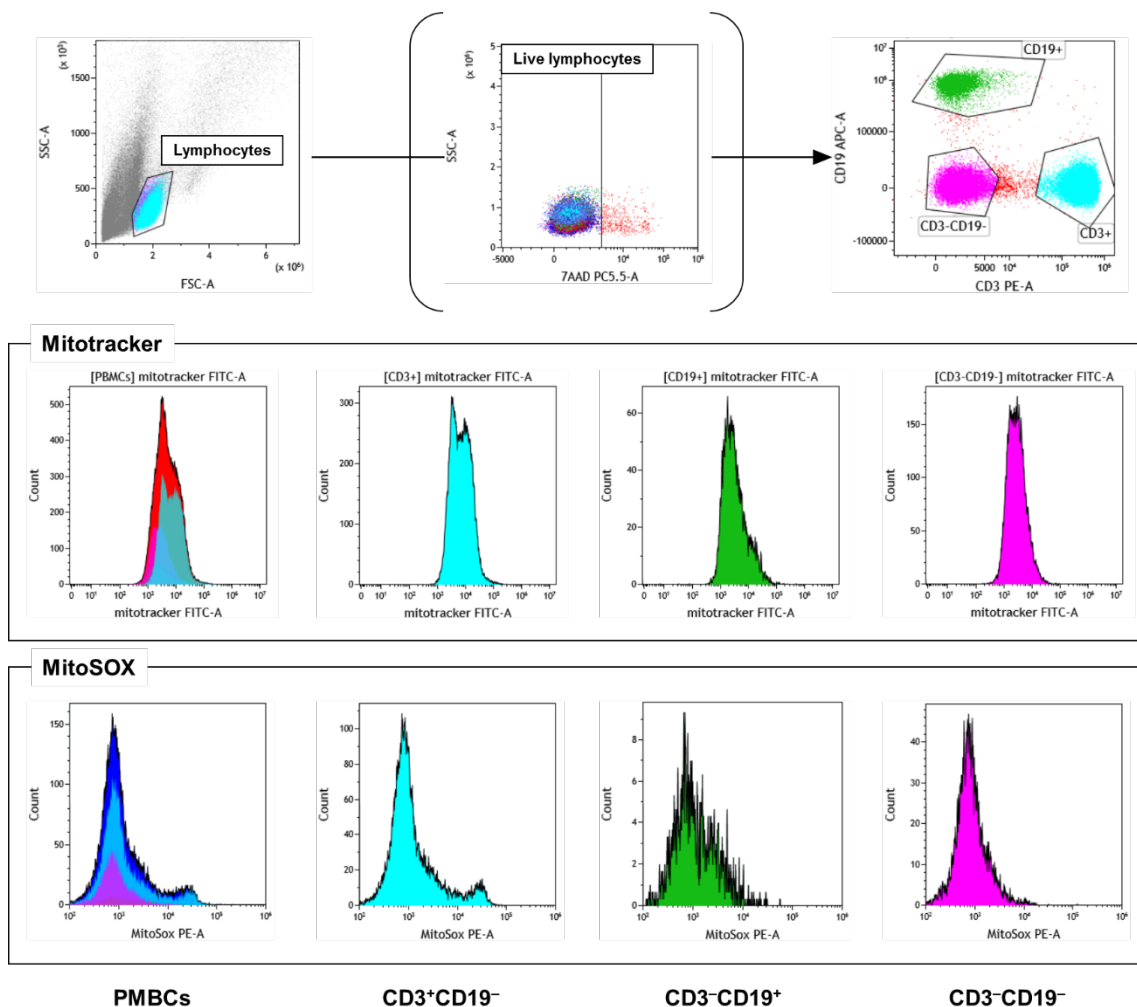

**Supplementary Figure S2. Gating strategy of Mitotracker™ and MitoSOX™ flow cytometry.** Gating strategies of flow cytometry analyses to assess the differences of mitochondrial mass and superoxide content between PBMCs and lymphocyte subpopulations from CMC and CSC samples. As opposed to Mitotracker™ cytometry, the addition of 7-AAD is not performed in the case of MitoSOX™ assay.

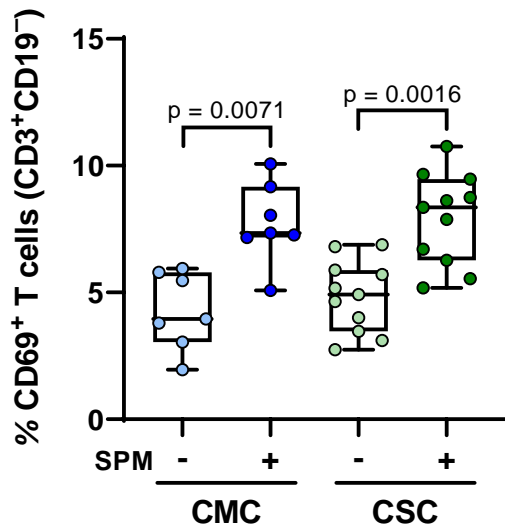

**Supplementary Figure S3. Immune cell activation upon spike peptide mix (SPM) stimulation in samples from cases who recovered of mild/ severe COVID-19.** CD69 surface expression of CD3<sup>+</sup>CD19<sup>-</sup> lymphocytes (n= 7-11) stratified according to the group severity: mild (CMC) and severe (CSC) cases. Lines represent median values, boxes the 25 and 75 percentiles, and whiskers mark maximum and minimum values. Statistical significance was assessed by two-tailed unpaired Student's and Paired t-tests.

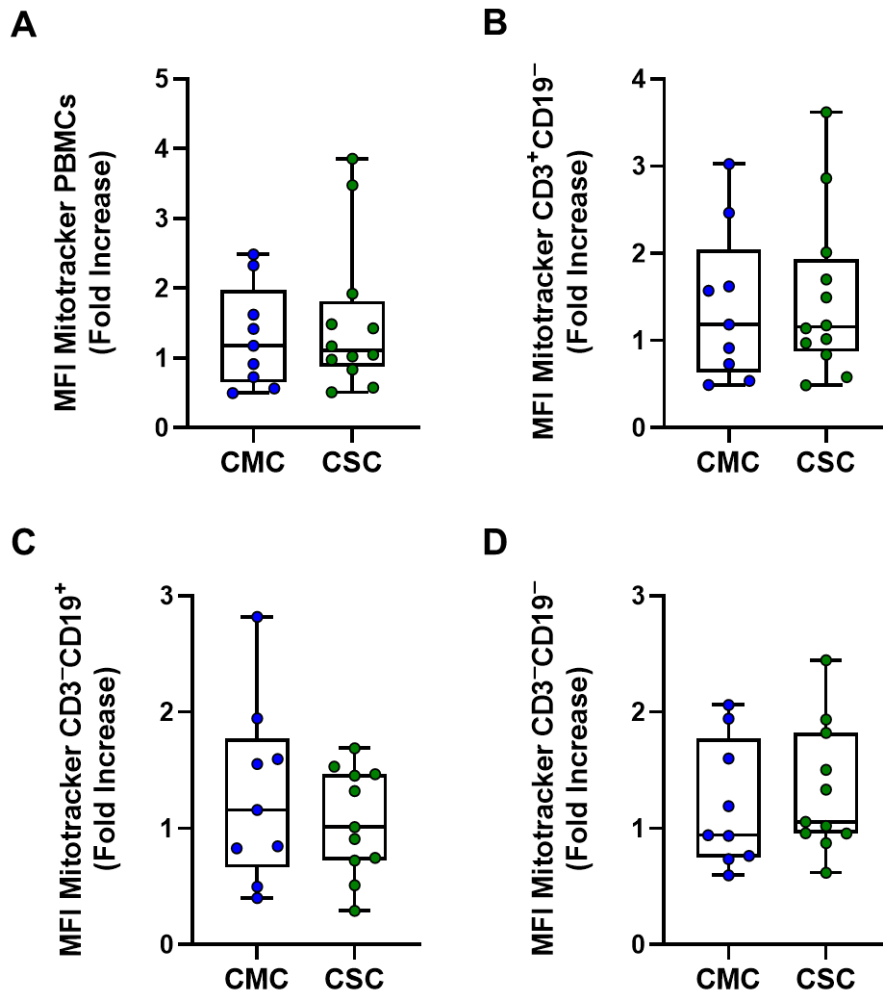

**Supplementary Figure S4. Mitochondrial mass in the lymphocyte subpopulations of individuals recovered of mild COVID-19 (CMC) and severe COVID-19 (CSC).** Diagrams display the fold increase in mitochondrial mass before and after stimulation with spike peptide mix (SPM) measured by flow cytometry (MitoTracker<sup>TM</sup> Green FM probe). The MFI ratio in the presence/absence of SPM was calculated for: (A) PBMCs, and (B) CD3<sup>+</sup>CD19<sup>-</sup>, (C) CD3<sup>-</sup>CD19<sup>+</sup>, (D) CD3<sup>-</sup>CD19<sup>-</sup> lymphocyte subpopulations from CMC (n= 9) and CSC (n= 10-11) groups. Results are expressed using box and whiskers diagrams, where lines represent median values, boxes the 25 and 75 percentiles, and whiskers mark maximum and minimum values. PBMCs from the CSC group were evaluated by unpaired non-parametric Mann-Whitney U test, and the statistical significance of the resting populations was assessed by two-tailed unpaired Student's t-test.

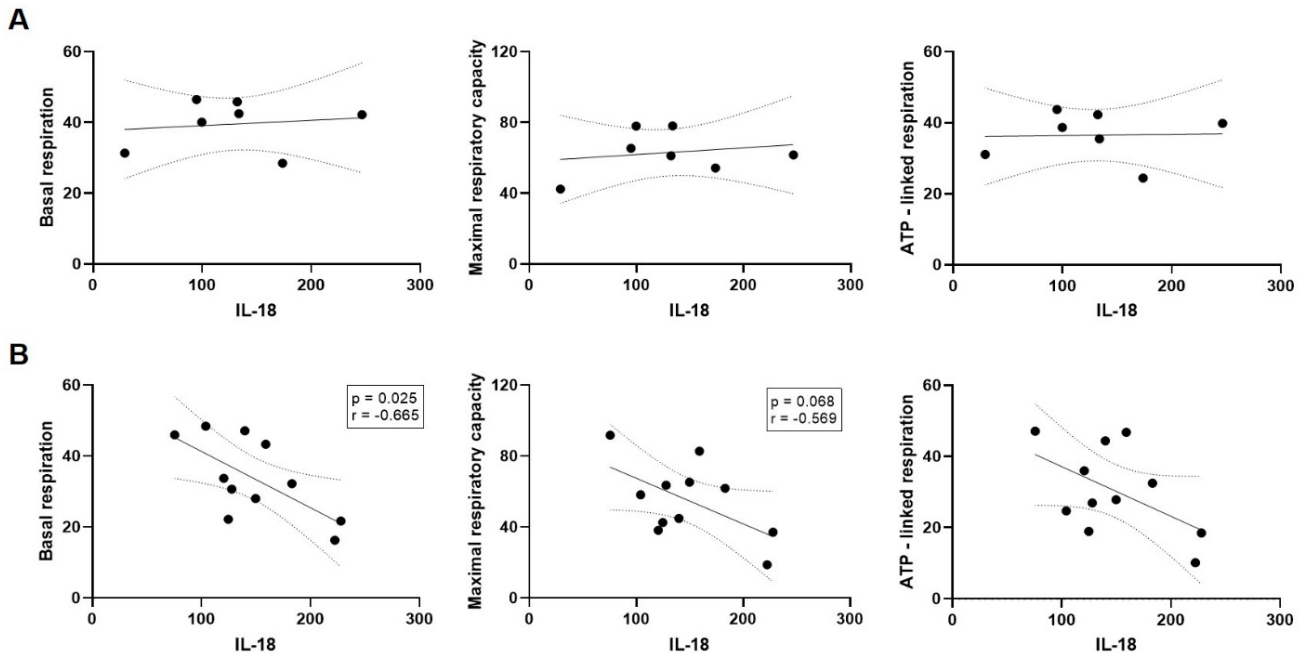

**Supplementary Figure S5. Correlation between IL-18 and mitochondrial parameters in subjects who recovered from mild (CMC) and severe (CSC) COVID-19.** Scatter plots showing the correlation between IL-18 and the mitochondrial OCR parameters in the CMC (**A**) and CSC (**B**) subjects. Linear correlation was assessed by using Spearman's rank correlation coefficient test.



**A**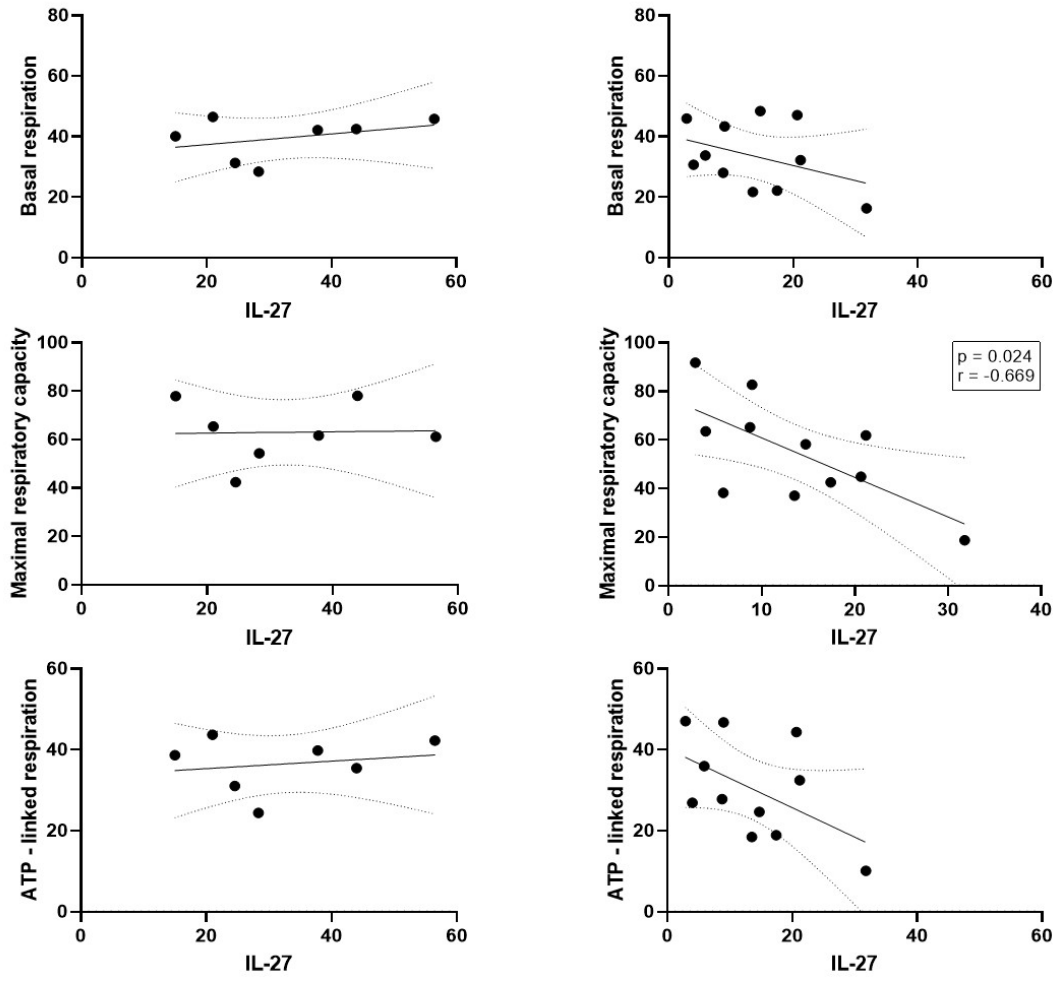**B**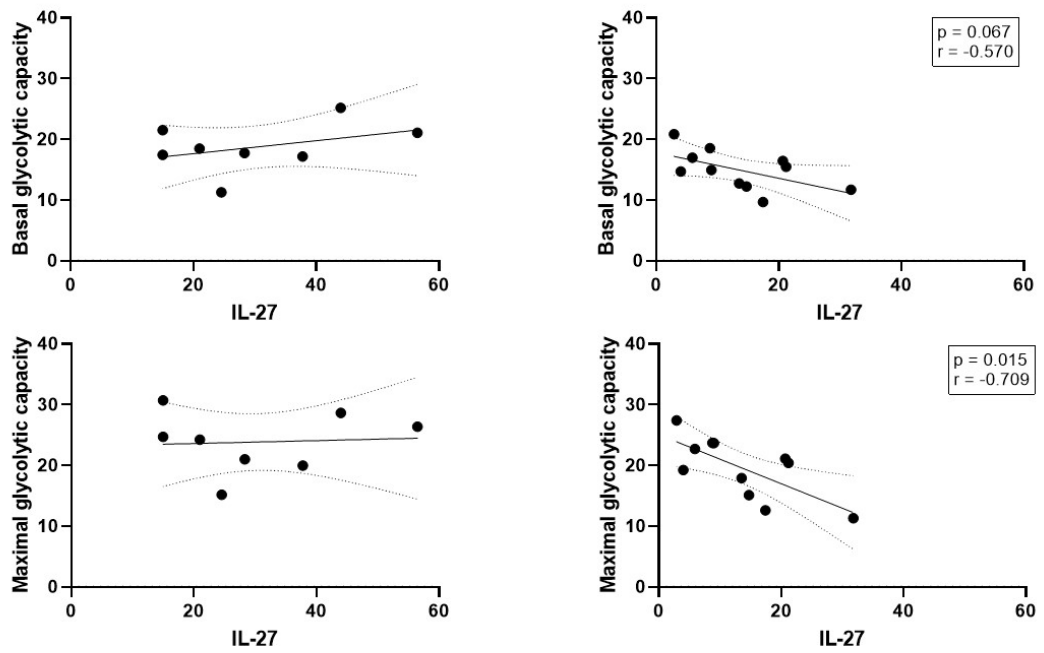

**Supplementary Figure S6. Correlation between IL-27 and mitochondrial parameters in subjects who recovered from mild (CMC) and severe (CSC) COVID-19.** Scatter plots showing the correlation between IL-27 and (A) the mitochondrial OCR parameters and (B) the ECAR profile in the CMC (Left) and CSC (Right) individuals. Linear correlation was assessed by using Spearman's rank correlation coefficient test.

**A**

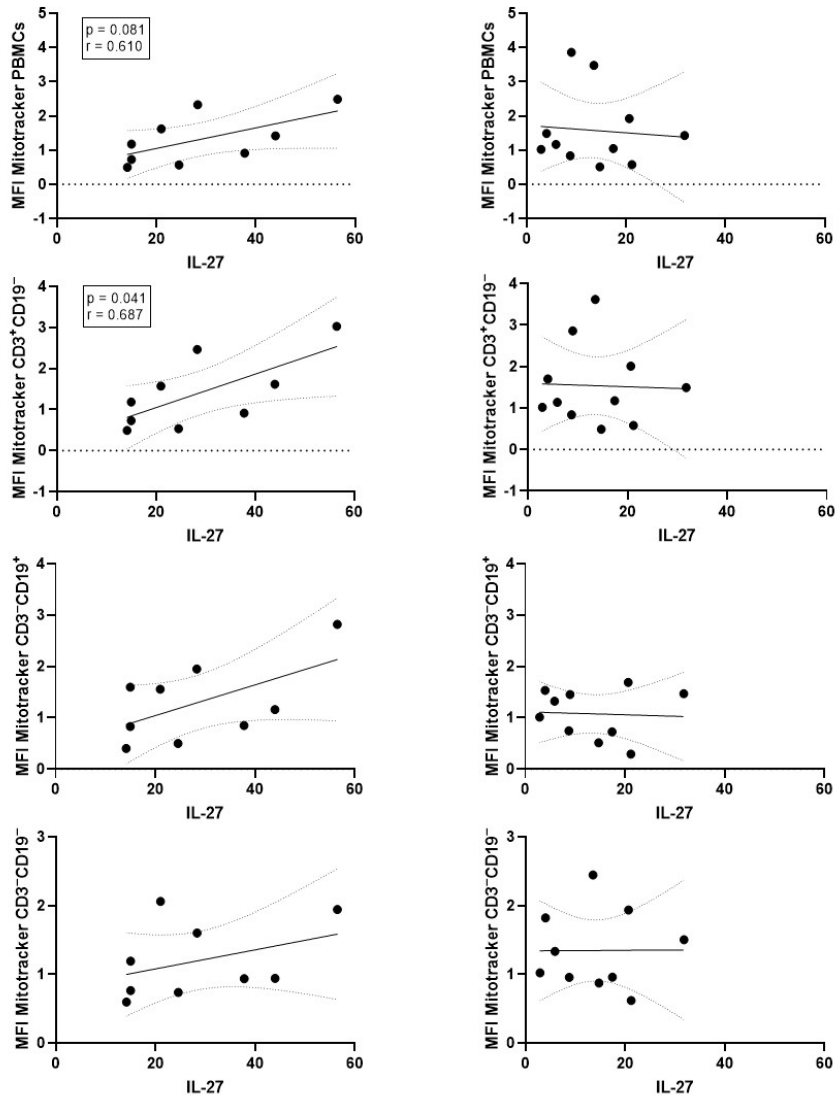

**B**

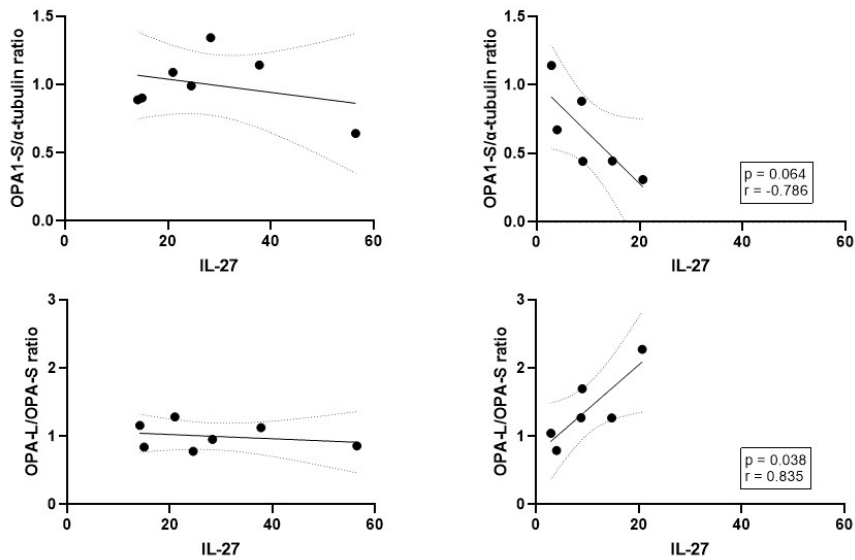

**Supplementary Figure S7. Correlation between IL-27 and mitochondrial mass and fusion in subjects who recovered from mild (CMC) and severe (CSC) COVID-19.** Scatter plots showing the correlation between IL-27 and (A) mitochondrial mass measured with MitoTracker™ Green FM probe, and (B) protein expression of the fusion protein OPA1-S and the OPA1-L/OPA1-S ratio quantification. Both evaluations were shown in the CMC (**Left**) and CSC (**Right**) individuals. Linear correlation was assessed by using Spearman's rank correlation coefficient test.
